# Supplementary material for: RNF213 gene silencing upregulates transforming growth factor β1 expression in bone marrow-derived mesenchymal stem cells and is involved in the onset of Moyamoya disease
Source: PubMed Central journal article supplement — Exp Ther Med. 2021 Jul 15;22(3):1024. doi: 10.3892/etm.2021.10456 (PMC8343649; doi:10.3892/etm.2021.10456), 2021-07-15

Figure S1. Expression of RNF213 and its correlation with TGF- $\beta$ 1. (A) Comparison of serum RNF213 levels in MMD and healthy control using ELISA. Data are expressed as the mean  $\pm$  SD and were analyzed by one-way ANOVA. (B) Correlation between serum RNF213 and serum TGF- $\beta$ 1 expression. RNF213, ring finger protein 213; MMD, Moyamoya disease; TGF- $\beta$ 1, transforming growth factor  $\beta$ 1.

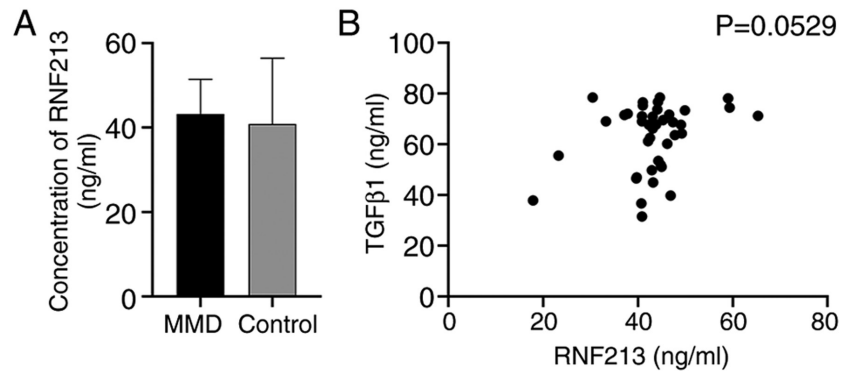

Figure S2. rBMSC morphological alterations after culture. (A) 12 h, (B) 48 h and (C) 3 days after culture (magnification, x200).

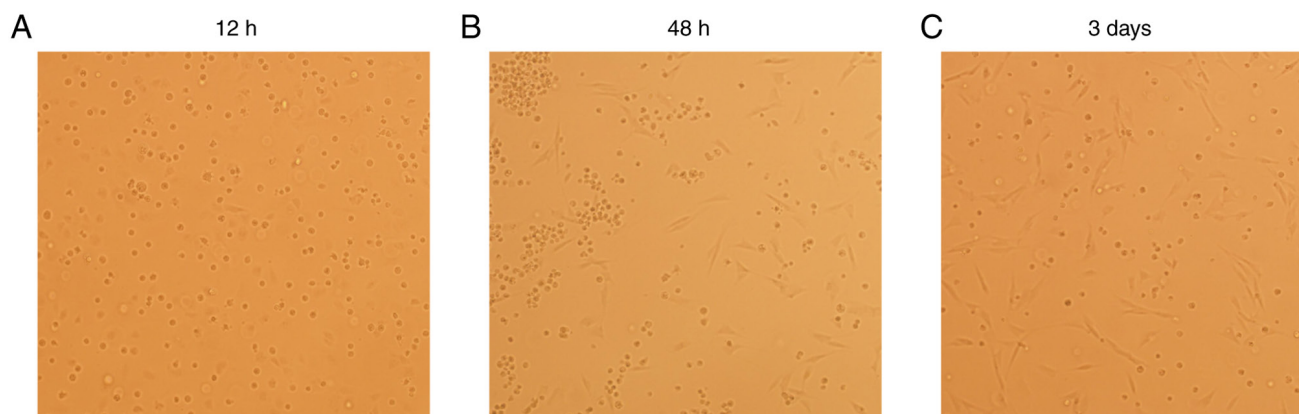

Supplement: Supplementary_Data.pdf [file Supplementary_Data.pdf]
